REVIEW ARTICLES

 **Ultrasound assessment of gastric content and volume**

P. Van de Putte<sup>1</sup> and A. Perlas<sup>2,3\*</sup>

<sup>1</sup> Department of Anaesthesiology, AZ Monica, Campus Deurne, Deurne, Belgium

<sup>2</sup> Department of Anaesthesia and Pain Management, Toronto Western Hospital, University Health Network, Toronto, ON, Canada

<sup>3</sup> Department of Anaesthesia, University of Toronto, 399 Bathurst St., Toronto, ON, Canada M5 T 2S8

\* Corresponding author. E-mail: anahi.perlas@uhn.on.ca

**Editor's key points**

- The authors review the literature regarding the use of ultrasound to estimate gastric volume and, thus, aspiration risk.
- Suggestions for clinical usage are provided.

Pulmonary aspiration of gastric content is a serious anaesthetic complication that can lead to significant morbidity and mortality. Aspiration risk assessment is usually based on fasting times. However, fasting guidelines do not apply to urgent or emergent situations and to patients with certain co-morbidities. Gastric content and volume assessment is a new point-of-care ultrasound application that can help determine aspiration risk. This systematic review summarizes the current literature on bedside ultrasound assessment of gastric content and volume relevant to anaesthesia practice. Seventeen articles were identified using predetermined criteria. Studies were classified into those describing the sonographic characteristics of different types of gastric content (empty, clear fluid, solid), and those describing methods for quantitative assessment of gastric volume. A possible algorithm for the clinical application of this new tool is proposed, and areas that require further research are highlighted.

**Keywords:** antrum; gastric content; pulmonary aspiration; ultrasound

Perioperative aspiration of gastric contents is a rare but serious complication of anaesthesia. The overall incidence in a mixed surgical population ranges between <0.1% and 19% depending on patient and surgical factors and it has not changed in the last few decades.<sup>1–5</sup> Aspiration pneumonia is associated with significant morbidity, including prolonged mechanical ventilation,<sup>6</sup> and carries a risk of mortality as great as 5%. Pulmonary aspiration is involved in up to 9% of all anaesthesia-related deaths.<sup>7,8</sup> One of the main risk factors for aspiration is the presence of gastric content. The critical volume threshold of gastric fluid that by itself increases aspiration risk is controversial, but healthy, fasted patients frequently have residual gastric volumes (GVs) of up to 1.5 ml kg<sup>-1</sup> without significant aspiration risk.<sup>9–13</sup> Sedation and general anaesthesia depress or impede the physiological mechanisms that protect against aspiration (the tone of the lower oesophageal sphincter and upper airway reflexes).<sup>14,15</sup> Since restriction of fluid and food intake before general anaesthesia is vital for patient safety, anaesthesiology societies have developed guidelines for preoperative fasting.<sup>16,17</sup> For example, current guidelines by the ASA recommend a minimum of 2 h of fasting for clear fluids, 6 h after a light meal (toast and clear fluids), and 8 h after a full meal with high calorie or fat content.<sup>17</sup> However, these guidelines apply only to healthy patients for elective surgery and are not reliable in patients with coexisting diseases that affect gastric emptying or volume, patients in whom airway management might be difficult or in emergency situations.<sup>17</sup> This systematic review summarizes the current state of knowledge on the use of

bedside ultrasound to evaluate gastric content and volume as they relate to aspiration risk assessment from the perspective of the clinical anaesthesiologist.

**Methods**

The recommendations and checklist of the PRISMA statement (Preferred Reporting Items for Systematic Reviews and Meta-Analysis) were followed to conduct and report this review.<sup>18</sup>

The National Library of Medicine's PubMed, OVID Medline, and EMBASE databases were searched since their date of inception to February 2013 using the following Medical Subject Headings: *gastric ultrasonography* or *gastric ultrasound* or *gastric sonography* and *stomach* or *antrum* were used. The search was restricted to English language articles and human subjects. Two independent reviewers read all citations. Prospective or retrospective experimental studies of portable 2D ultrasonography on human subjects, case series, or observational studies were selected for inclusion if they addressed one or two of the following questions: (i) Can ultrasound determine the nature of gastric content (empty, clear fluid, or thick fluid/solid)?, (ii) Can ultrasound estimate the volume of gastric fluid?, or both. Commentaries, abstracts, letters to the editor, case reports, editorials, and meeting proceedings were excluded. Discrepancies were settled by discussion and consensus. Selected articles underwent full-text review and references were screened for further articles not identified by the searches.

The following data were extracted from each included study: publication year, country of origin, study design, number of subjects and patient characteristics, gastric sections studied (antrum, body, fundus), scanning position, and plane. For quantitative studies, details of mathematical models were extracted (reference standard, correlation coefficient).

### Results

Three hundred and ninety-four citations were identified (Fig. 1). Based on title and abstract, 356 were excluded as not meeting inclusion criteria, and five were duplicates. Thirty-three articles were retrieved for full-text review. Of these, 22 publications were excluded (13 studied gastric emptying, three studied gastric motility, and six were on other gastroenterology applications not directly related to aspiration risk assessment). Six additional articles were identified from reference lists. Seventeen

articles were included in this review. Eight articles dealt with qualitative assessment (Table 1), seven articles dealt with quantitative assessment (Table 2), and two additional studies were included in both categories. Of the included studies, 41% ( $n=7$ ) were published before 2000, 18% ( $n=3$ ) between 2000 and 2009, and the remaining 41% ( $n=7$ ) in or after 2010. The majority of the studies originated in North America (47%,  $n=8$ ) and Europe (41%,  $n=7$ ), whereas 12% ( $n=2$ ) were from Japan. A total of 533 subjects were included in the qualitative studies and 542 subjects in the quantitative studies. Study populations consisted of healthy volunteers ( $n=267$ ), pregnant patients ( $n=73$ ), newborns ( $n=32$ ), other paediatric patients ( $n=16$ ), elective adult surgical subjects ( $n=467$ ), upper gastric endoscopy ( $n=140$ ), or intensive care patients ( $n=80$ ). The antrum was evaluated in 82% of the studies, the fundus in 23%, and the gastric body in 35%. Two studies did not specify which section of the stomach was evaluated.

Downloaded from <https://academic.oup.com/bja/article/113/11/2291/9939> by guest on 18 April 2024

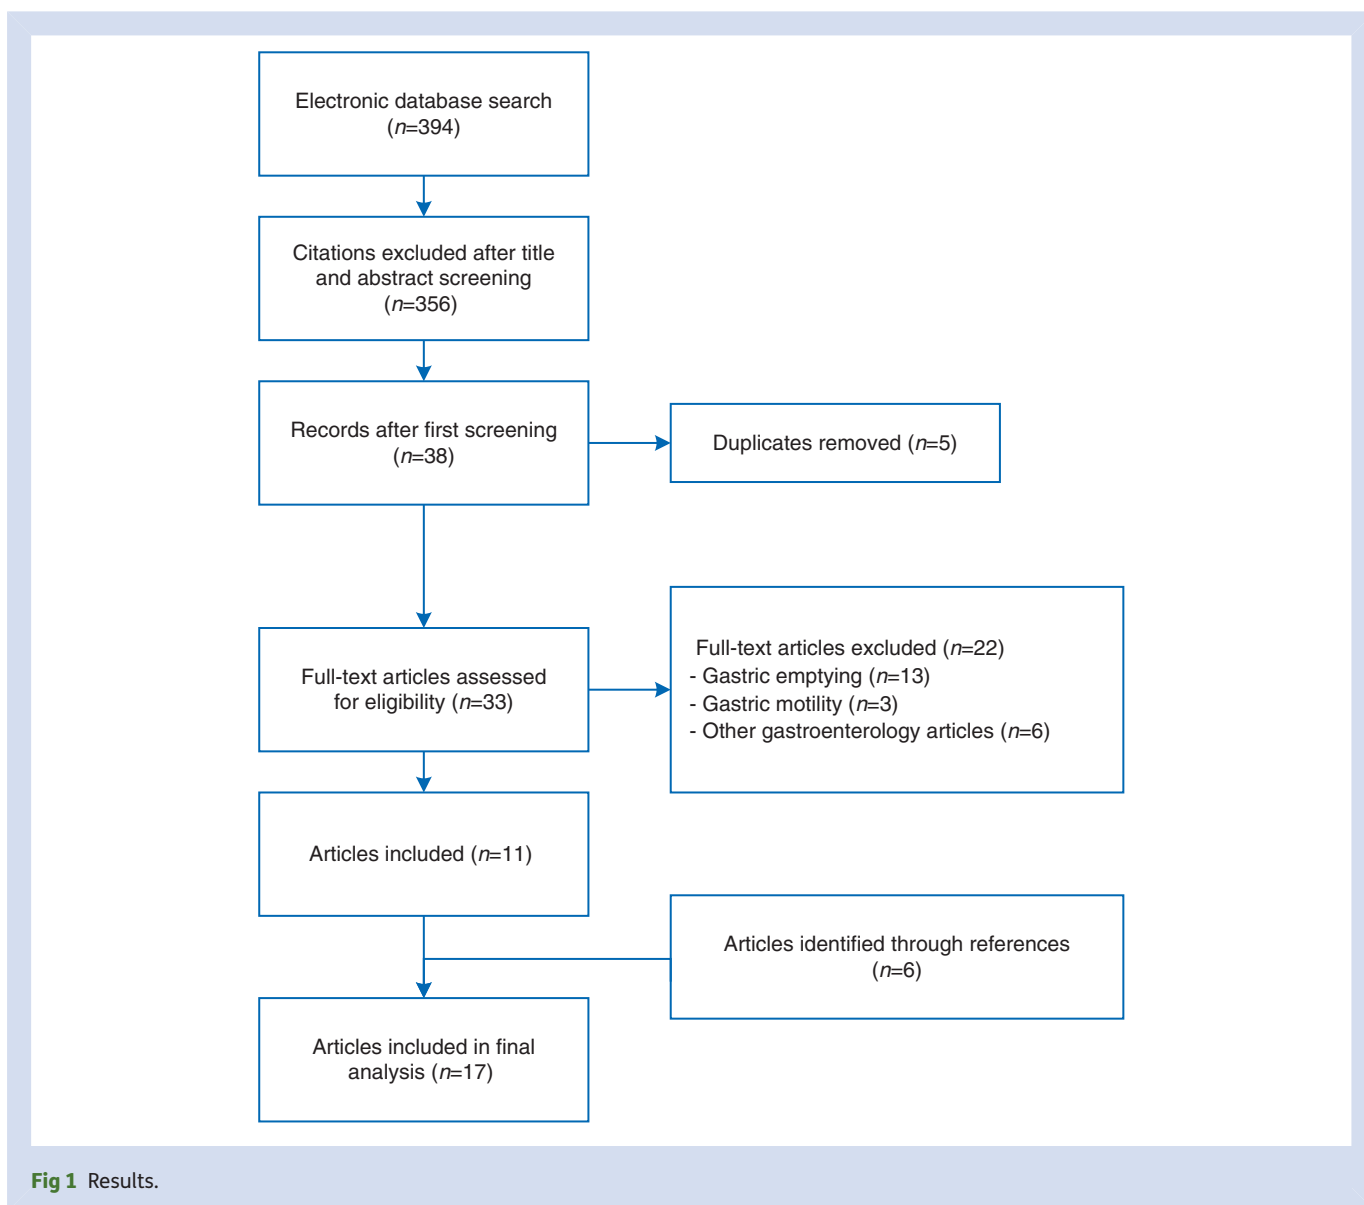

Fig 1 Results.

**Table 1** Qualitative studies. \*, mean (sd); and °, range

| Author                                   | Year | Country         | Design           | Study population                   | n   | Age (yr) | BMI     | Patient position | Gastric section | Scanning plane              | Empty | Fluid | Solid |
|------------------------------------------|------|-----------------|------------------|------------------------------------|-----|----------|---------|------------------|-----------------|-----------------------------|-------|-------|-------|
| Sijbrandij and Op den Orth <sup>19</sup> | 1991 | The Netherlands | Pictorial essay  | NA                                 | NA  | NA       | NA      | RLD              | A/F/B           | Oblique left upper quadrant | No    | Yes   | No    |
| Carp and colleagues <sup>20</sup>        | 1992 | USA             | OBS              | Females (OB and non-OB)            | 93  | NR       | NR      | SIT/RLD          | A/B             | Oblique left upper quadrant | No    | Yes   | Yes   |
| Jayaram and colleagues <sup>21</sup>     | 1997 | USA             | OBS              | Females (OB and non-OB)            | 94  | 20–40°   | 20–40°  | SIT              | A/B             | Oblique left upper quadrant | No    | Yes   | Yes   |
| Jacoby and colleagues <sup>22</sup>      | 2003 | USA             | INT blind        | Volunteers                         | 20  | NR       | NR      | SUP/RLD          | NR              | Axial                       | No    | Yes   | Yes   |
| Perlas and colleagues <sup>23</sup>      | 2009 | Canada          | OBS              | Volunteers                         | 18  | NR       | NR      | SUP/RLD          | A/B/F           | Parasagittal                | Yes   | Yes   | Yes   |
| Bouvet and colleagues <sup>24</sup>      | 2009 | France          | INT blind        | Volunteers                         | 22  | 27–51°   | 21–24°  | Semi SIT         | A               | NR                          | Yes   | Yes   | Yes   |
| Sporea and Popescu <sup>25</sup>         | 2010 | Romania         | Technical report | NA                                 | NA  | NA       | NA      | NA               | A/B/F           | Axial/sagittal              | Yes   | Yes   | No    |
| Koenig and colleagues <sup>26</sup>      | 2011 | USA             | OBS              | ICU patients for urgent intubation | 80  | 20–91°   | NR      | SUP              | B/F             | Axial/mid-axillary line     | Yes   | Yes   | Yes   |
| Perlas and colleagues <sup>27</sup>      | 2011 | Canada          | OBS              | Adult surgical patients            | 200 | 51 (16)* | 28 (5)* | SUP/RLD          | A               | Sagittal                    | Yes   | Yes   | No    |
| Cubillos and colleagues <sup>28</sup>    | 2012 | Canada          | Pictorial essay  | Volunteers                         | 6   | 34 (7)*  | 27 (2)* | RLD              | A               | Axial/sagittal              | Yes   | Yes   | Yes   |

### Qualitative gastric sonography: can ultrasound determine the nature of gastric content (empty, clear fluid, or thick fluid/solid)?

Ten articles describe the utility of ultrasound to determine the nature of the gastric content (Table 1).

#### Scanning technique

The stomach has been imaged with the patient in the supine, sitting, semi-sitting, or right lateral decubitus (RLD) position. The best position depends on the section of the stomach to be imaged and affects sonographic findings. Several studies suggest that the distal parts of the stomach (antrum and body) are better evaluated in a semi-sitting or RLD position.<sup>19–23 27–29</sup> Owing to a gravitational shift, a greater proportion of gastric content will move towards the more dependent areas of the stomach in these two positions. This may be especially important to evaluate gastric content in low-volume states in which gastric fluid may only be visible in a sitting or RLD position.<sup>20 23 27</sup> Scanning technique was similar among different reports whether they studied healthy volunteers or patients. The only exception is a report on critically ill patients in which it may not be feasible to scan in a patient position other than supine.<sup>26</sup>

A curved array low-frequency transducer (2–5 MHz) with standard abdominal settings is most useful in adults. It provides the necessary penetration to identify the relevant anatomic landmarks.<sup>19</sup> A linear high-frequency transducer can be used in leaner or paediatric patients or to obtain detailed images of the gastric wall. The gastric wall is 4–6 mm thick and has a characteristic appearance of five distinct sonographic layers that are best visualized with a high-frequency transducer (e.g. 5–12 MHz) in the fasting state.<sup>19 25 27 28</sup> These layers help differentiate the stomach from other hollow viscus. Starting at the inner surface of the stomach, the first thin hyperechoic layer corresponds to the mucosal–air interface. A second hypoechoic layer is the muscularis mucosa. A third hyperechoic layer corresponds to the submucosa. A fourth hypoechoic layer is most prominent and corresponds to the muscularis propria, whereas a fifth thin hyperechoic layer is the serosa.<sup>19 25 27 28</sup>

**Gastric antrum** Several studies suggest that the antrum is the gastric region that is most amenable to sonographic examination.<sup>19 23 25 27–29</sup> It is the gastric portion most consistently identified (98–100% of cases).<sup>23 24 30</sup> It is found superficially between the left lobe of the liver anteriorly and the pancreas posteriorly in a sagittal or para-sagittal scanning plane in the epigastrium.<sup>22–25 27 28 31</sup> Important vascular landmarks including both the aorta or inferior vena cava (IVC) and either the superior mesenteric artery or vein have been used to standardize a scanning plane through the antrum.<sup>22–24 27 28</sup> Not only is the antrum highly amenable to ultrasound imaging, its evaluation accurately reflects the content of the entire organ.

**Gastric body** The body of the stomach may be imaged by sliding the transducer towards the left subcostal margin using an oblique scanning plane.<sup>19–21 23 25 26</sup> In this plane, the

**Table 2** Sonographic presentation of the antrum and contents

|              | Empty                                                          | Clear fluid                  | Milk or suspensions | Solid                                         |
|--------------|----------------------------------------------------------------|------------------------------|---------------------|-----------------------------------------------|
| Antral shape | Flat, collapsed, or round (bull's eye)                         | Round, distended             | Round, distended    | Round, distended                              |
| Antral wall  | Thick, prominent muscularis propriae                           | Thin                         | Thin                | Thin                                          |
| Content      | None (grade 0) or small amount of hypoechoic content (grade 1) | Hypoechoic                   | Hyperechoic         | Hyperechoic<br>Heterogeneous (mixed with air) |
| Peristalsis  | None                                                           | Present (usually fast waves) | Present             | Present (usually slow waves)                  |

anterior wall is consistently identified, extending from the lesser to the greater curvature.<sup>23</sup> However, the presence of air in the body frequently obscures the posterior wall, and it may be more difficult to image a full cross-section of the gastric body.

**Gastric fundus** The fundus is located in the left upper quadrant of the abdomen, inferior to the diaphragm, anterior to the left kidney, and posterior to the spleen. It is the most challenging section of the stomach to image due to its deep location and the lack of a wide acoustic window due to the rib cage. Two different approaches have been described. A left lateral, intercostal, trans-splenic approach has been reported with limited success.<sup>23 25</sup> Alternatively, a longitudinal scan in the mid-axillary line has been used.<sup>26</sup> Air is commonly found in both the fundus and the body, even in 'empty' stomachs, which hinders visualization of these two sections.<sup>19 23</sup>

**Sonographic evaluation of gastric content**

An early study of gastric ultrasound in the anaesthesia literature differentiated between liquid and solid gastric contents.<sup>20</sup> In this patient series, the stomach could only be identified in 60% of patients and could not be located when empty. However, more recent studies using contemporary technology report consistent success in identifying the stomach, especially the gastric antrum, even in the empty state.<sup>23-25 27 30</sup> In the empty stomach, the antrum appears flat with juxtaposed anterior and posterior walls (Fig. 2). In a sagittal plane, it is round to ovoid and has been compared with a 'target' or 'bull's eye' pattern (Table 2).<sup>23 28</sup> In an axial scanning plane, the empty antrum has a 'gloved finger' appearance.<sup>25</sup>

Baseline gastric secretions, water, apple juice, black coffee, and tea appear hypoechoic or anechoic.<sup>23-24 28</sup> With increasing volume, the antrum becomes round and distended, with thin walls (Fig. 3). Air or gas bubbles appear as multiple mobile punctuate echoes, giving the appearance of a 'starry night'.<sup>23</sup> Milk, thick fluids, or suspensions have increased echogenicity.<sup>28</sup> After a solid meal, a 'frosted-glass' pattern has been described caused by substantial amount of air mixed with the food bolus during the chewing and swallowing processes. The air/solid mixture creates multiple ring-down artifacts on the anterior gastric wall, which typically 'blur' the posterior wall of the antrum.<sup>23 28</sup> After some time, the air is displaced and the solid content can be better appreciated with a mixed echogenicity (Fig. 4, Table 2).<sup>23 28</sup> After oral intake of any

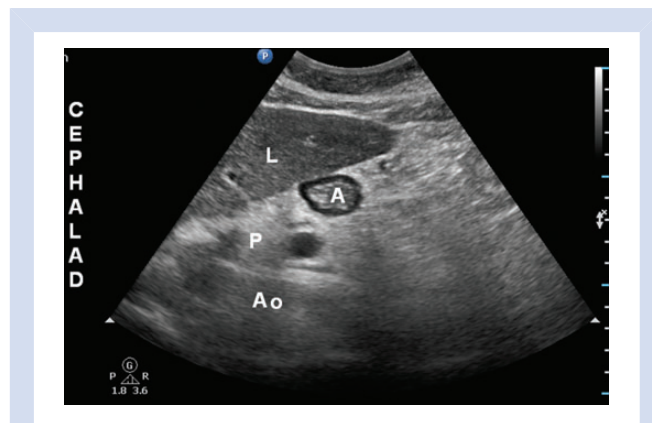

**Fig 2** Sonographic image of the gastric antrum of an empty stomach. Note the antrum appears small, with no visible content. The muscularis propria is seen distinctly as a thick hypoechoic layer of the gastric wall. A, antrum; L, liver; P, pancreas; Ao, aorta.

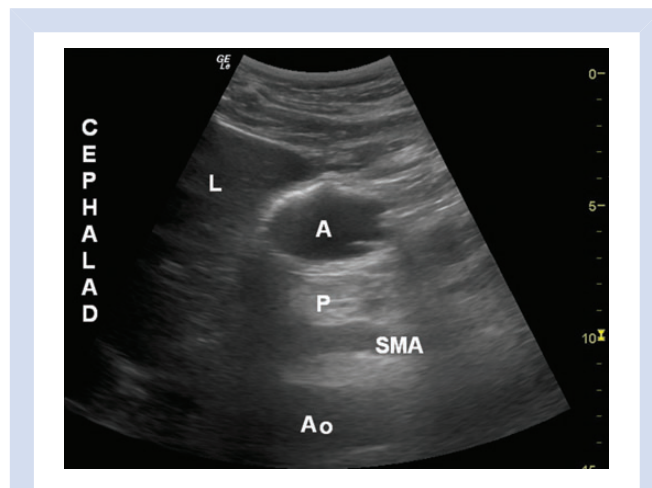

**Fig 3** Sonographic image of the gastric antrum containing clear fluid. Note the antrum appears distended with hypoechoic/anechoic content. A, antrum; L, liver; P, Pancreas; Ao, Aorta; SMA, superior mesenteric artery.

type, peristaltic gastric contractions occur. They are noted easily on ultrasound and can be lumen occlusive or non-occlusive.<sup>32</sup>



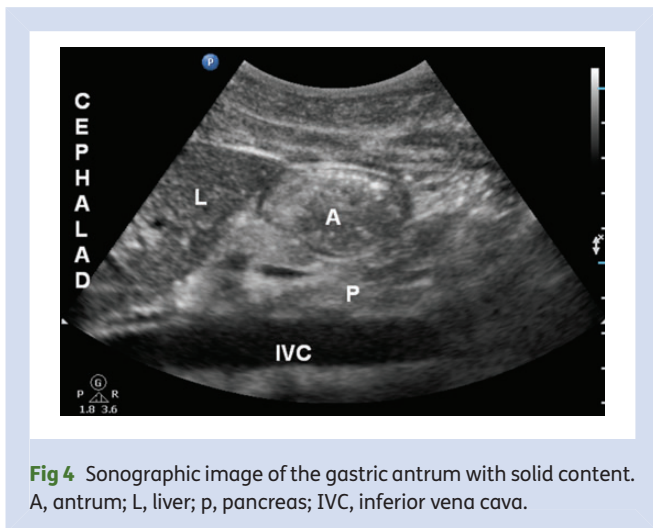

**Fig 4** Sonographic image of the gastric antrum with solid content. A, antrum; L, liver; p, pancreas; IVC, inferior vena cava.

### Quantitative gastric sonography: can ultrasound estimate the volume of gastric fluid?

Nine articles report a numerical correlation between an ultrasound-determined antral cross-sectional area (CSA) and the total volume of gastric fluid (Table 3). Antral CSA can be measured by using two perpendicular diameters and the formula of the area of an ellipse:  $CSA = (AP \times CC \times \pi) / 4$  ( $AP$  = antero-posterior diameter and  $CC$  = craniocaudal diameter) (Fig. 5A).<sup>33</sup> Alternatively, a ‘free tracing’ tool for area measurement has been used in some reports (Fig. 5B).<sup>29 34</sup> Regardless of the method used, all measurements need to be taken with the antrum at rest (between contractions) to avoid underestimating volume.<sup>23 24 30 31 35</sup> In most recent studies, antral CSA was measured including the full thickness of the gastric wall, from serosa to serosa.<sup>23 24 30 31 34 36</sup> Previously, the inner surface of the mucosa<sup>37</sup> or the muscularis propriae were used.<sup>35</sup>

Most authors report a linear correlation between antral CSA and gastric fluid volume with the Pearson correlation coefficients ranging between 0.6 and 0.91.<sup>29–31 34–36</sup> Three studies directly compare the strength of this correlation in different patient positions.<sup>23 35 36</sup> All three studies conclude that antral CSA measured in the RLD correlates most strongly with GV. This is conceivably explained by a greater proportion of gastric content moving preferentially from the fundus and body towards the more dependent antrum in the RLD. So, for any given GV, the antrum appears larger in the RLD vs other patient positions.

Four studies report mathematical models that allow prediction of total GV.<sup>23 27 30 36</sup> In a preliminary study, Perlas and colleagues<sup>23</sup> described a logarithmic predictive model based on 70 adult non-pregnant subjects randomized to ingest six different predetermined volumes of water. This preliminary model was as follows:

$$GV \text{ (ml)} = -372.54 + 282.49 \times \log(\text{right-lat CSA}) - 1.68 \times \text{weight}$$

However, in a follow-up validation study using blinded gastroscopic suction as a reference standard in 108 adult subjects, this preliminary model was found to overestimate GV, especially at low-volume states. This may be due to the original study’s inability to account for baseline gastric secretions. A new more accurate linear model was reported based on gastroscopic fluid assessment:<sup>31</sup>

$$GV \text{ (ml)} = 27.0 + 14.6 \times \text{right-lat CSA} - 1.28 \times \text{age}$$

This newer model is mathematically robust ( $r=0.86$ ), yet simple to apply clinically with age as the only patient characteristic co-variant (Table 4). It is accurate with a mean difference of 6 ml between the predicted and measured volumes. It is applicable to adult, non-pregnant subjects with BMI up to  $40 \text{ kg m}^{-2}$  and can predict volumes of up to 500 ml.

In a prospective observational study of 183 surgical patients, Bouvet and colleagues<sup>30</sup> presented an alternative model based on measurements of antral CSA in the semi-sitting position, using blind nasogastric aspiration as a reference standard, as follows:

$$GV \text{ (ml)} = -215 + 57 \log CSA \text{ (mm}^2) - 0.78 \text{ age (yr)} \\ - 0.16 \text{ height (cm)} - 0.25 \text{ weight (kg)} \\ - 0.80 \text{ ASA} + 16 \text{ ml (in the case of emergency)} \\ + 10 \text{ ml (in the case of preoperative ingestion of 100 ml antacid prophylaxis)}$$

With a correlation coefficient of 0.72, this model is applicable to the adult non-pregnant population and can predict volumes of up to 250 ml.

One final model has been reported by Schmitz and colleagues<sup>36</sup> who studied 16 children at various intervals after ingestion of  $7 \text{ ml kg}^{-1}$  of raspberry syrup using magnetic resonance imaging as the reference standard. The reported model is as follows:

$$GV \text{ (ml kg}^{-1}) = 0.009 \times \text{antral CSA}_{\text{RLD}} \text{ (mm}^2) - 1.36$$

This model has a correlation coefficient of 0.79. However, the limits of agreement between the predicted and measured volumes according to a Bland–Altman analysis were too wide for accurate clinical prediction ( $2.8 \text{ ml kg}^{-1}$ ). This is possibly due to the small number of subjects studied ( $n=16$ ) and total readings used for model development ( $n=23$ ). Furthermore, most readings were performed in empty ( $n=6$ ) or near empty ( $n=14$ ) conditions. The authors of this model indicated it is not accurate enough for clinical application.

In summary, two mathematical models are available to predict GV based on antral CSA in adults (Table 5).<sup>30 31</sup> They are currently thought to be accurate and clinically applicable. Regardless of which of these two models one decides to use, a number of steps need to be followed to ensure accurate results. First, the scanning technique needs to follow a similar scanning plane and patient position as described in the original source publication (i.e. a sagittal plane in the semi-sitting position for Bouvet and colleagues or RLD for Perlas and

**Table 3** Quantitative studies. A, antrum; ACSA, antral cross-sectional area; CC, correlation coefficient; INT, interventional; NG, nasogastric; NR, not reported; OBS, observational; RLD, right lateral decubitus; SIT, sitting; SUP, supine; UGE, upper gastric endoscopy. Age and BMI are mean (SD)\* or range<sup>†</sup>

| Author                                | Year | Country     | Design    | Study population      | n   | Age (yr)           | BMI                | Patient position    | Gastric section | Scanning plane          | 2D measure | Reference standard | Mathematical model | CC (r) |
|---------------------------------------|------|-------------|-----------|-----------------------|-----|--------------------|--------------------|---------------------|-----------------|-------------------------|------------|--------------------|--------------------|--------|
| Fujigaki and colleagues <sup>29</sup> | 1993 | Japan       | OBS       | Adults                | 39  | 46 (3)*            | NR                 | SIT                 | Distal          | Sagittal                | ACSA       | NG suction         | No                 | NR     |
| Ricci and colleagues <sup>37</sup>    | 1993 | Italy       | INT blind | Volunteers            | 15  | 24–47 <sup>†</sup> | NR                 | SUP/SIT             | A               | Transverse to the organ | ACSA       | NG suction         | No                 | NR     |
| Hveem and colleagues <sup>34</sup>    | 1994 | Norway      | INT       | Adults                | 35  | 16–90 <sup>†</sup> | NR                 | Semi SIT            | A               | Sagittal                | ACSA       | Gastroscopy        | No                 | 0.91   |
| Tomomasa and colleagues <sup>35</sup> | 1996 | Japan       | INT       | Newborns              | 32  | ≤1 m <sup>†</sup>  | NR                 | RLD                 | A               | Sagittal                | ACSA       | NG suction         | No                 | 0.83   |
| Perlas and colleagues <sup>23</sup>   | 2009 | Canada      | INT       | Volunteers            | 90  | 21–42 <sup>†</sup> | 21–26 <sup>†</sup> | SUP/RLD             | A               | Parasagittal            | ACSA       | Ingested volume    | Yes                | 0.82   |
| Bouvet and colleagues <sup>24</sup>   | 2009 | France      | INT Blind | Volunteers            | 22  | 27–51 <sup>†</sup> | 21–24 <sup>†</sup> | Semi SIT            | A               | NR                      | ACSA       | Ingested volume    | No                 | NR     |
| Bouvet and colleagues <sup>30</sup>   | 2011 | France      | OBS       | Adult surg patients   | 183 | 49 (18)*           | 23 (3)*            | Semi SIT            | A               | Sagittal                | ACSA       | NG suction         | Yes                | 0.72   |
| Schmitz and colleagues <sup>36</sup>  | 2012 | Switzerland | INT       | Paediatric volunteers | 16  | 6–13 <sup>†</sup>  | NR                 | SUP/RLD<br>Semi SIT | A               | Sagittal                | ACSA       | MRI                | Yes                | 0.79   |
| Perlas and colleagues <sup>31</sup>   | 2013 | Canada      | INT blind | Patients for UGE      | 110 | 51 (14)*           | 25 (5)*            | RLD                 | A               | Sagittal                | ACSA       | Gastroscopy        | Yes                | 0.86   |

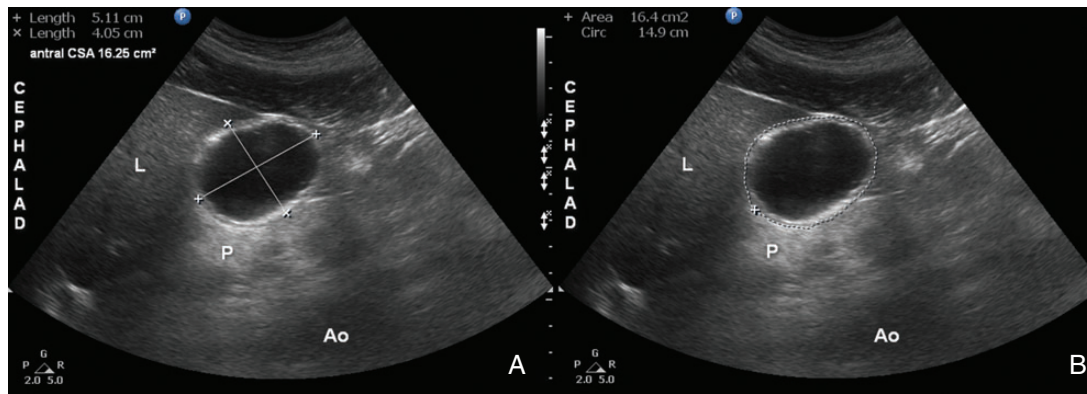

**Fig 5** Two alternate methods to measure antral CSA. (a) illustrates a method based on two perpendicular diameters (cranio-caudal and antero-posterior). (b) illustrates a free-tracing method following the outer border of the antrum at the level of the gastric serosa.

**Table 4** Predicted GV (ml) based on measured gastric antral CSA (cm<sup>2</sup>), stratified by patient age. Adapted and reproduced with permission from Perlas et al.<sup>31</sup>

| Right lat CSA (cm <sup>2</sup> ) | Age (yr) |     |     |     |     |     |     |
|----------------------------------|----------|-----|-----|-----|-----|-----|-----|
|                                  | 20       | 30  | 40  | 50  | 60  | 70  | 80  |
| 3                                | 45       | 32  | 20  | 7   | 0   | 0   | 0   |
| 5                                | 74       | 62  | 49  | 36  | 23  | 10  | 0   |
| 7                                | 103      | 91  | 78  | 65  | 52  | 40  | 27  |
| 9                                | 133      | 120 | 107 | 94  | 82  | 69  | 56  |
| 11                               | 162      | 149 | 136 | 123 | 111 | 98  | 85  |
| 13                               | 191      | 178 | 165 | 153 | 140 | 127 | 114 |
| 15                               | 220      | 207 | 194 | 182 | 169 | 156 | 143 |
| 17                               | 249      | 236 | 224 | 211 | 198 | 185 | 173 |
| 19                               | 278      | 266 | 253 | 240 | 227 | 214 | 202 |
| 21                               | 307      | 295 | 282 | 269 | 256 | 244 | 231 |
| 23                               | 337      | 324 | 311 | 298 | 285 | 273 | 260 |
| 25                               | 366      | 353 | 340 | 327 | 315 | 302 | 289 |
| 27                               | 395      | 382 | 369 | 357 | 344 | 331 | 318 |
| 29                               | 424      | 411 | 398 | 386 | 373 | 360 | 347 |

**Table 5** Current models for GV assessment based on antral CSA. CSA, cross-sectional area; GV, gastric volume

|                             | Bouvet and colleagues <sup>30</sup>                                                                                                                                         | Perlas and colleagues <sup>31</sup>                                            |
|-----------------------------|-----------------------------------------------------------------------------------------------------------------------------------------------------------------------------|--------------------------------------------------------------------------------|
| Formula                     | GV (ml) = -215 + 57 log CSA (mm <sup>2</sup> ) - 0.78 age (yr) - 0.16 height (cm) - 0.25 weight (kg) - 0.80 ASA + 16 ml (emergency) + 10 ml (if antacid prophylaxis 100 ml) | GV (ml) = 27.0 + 14.6 × right-lateral CSA (cm <sup>2</sup> ) - 1.28 × age (yr) |
| Scanning plane              | Sagittal                                                                                                                                                                    | Sagittal                                                                       |
| Scanning position           | Semi-sitting                                                                                                                                                                | Right lateral decubitus                                                        |
| Antral CSA measurement      | Serosa to serosa                                                                                                                                                            | Serosa to serosa                                                               |
| Patient characteristics     | Non-pregnant adults                                                                                                                                                         | Non-pregnant adults                                                            |
| Age (yr)                    | 18–95                                                                                                                                                                       | 18–85                                                                          |
| BMI (kg cm <sup>-2</sup> )  | 14–31                                                                                                                                                                       | 19–40                                                                          |
| Max. predicted volume (ml)  | 250                                                                                                                                                                         | 500                                                                            |
| Correlation coefficient (r) | 0.72                                                                                                                                                                        | 0.86                                                                           |
| Reference standard          | Nasogastric suction                                                                                                                                                         | Gastroscopy                                                                    |

colleagues). Secondly, measurements need to be taken with the antrum at rest, between peristaltic contractions. Thirdly, CSA is measured from serosa to serosa, including the full thickness of the gastric wall. Finally, each model is only applicable within the patient characteristic range in which it was built (adult, non-pregnant subjects) and within the ranges of volumes studied in the source publication (Table 5).

A semi-quantitative three-point grading system has been reported as a simple screening tool to differentiate low- from high-volume states.<sup>27</sup> This three-point grading system is based solely on qualitative evaluation of the clear-fluid-containing gastric antrum that is scanned in both the supine and RLD positions. A grade 0 antrum appears empty in both positions, and suggests no gastric content is present. A grade 1 antrum appears empty in the supine position, but clear fluid is visible in the RLD, consistent with a small volume of gastric fluid. A subsequent validation study suggests that subjects with a grade 1 antrum have <100 ml of gastric fluid in 75% of cases.<sup>31</sup> A grade 2 antrum is that in which clear fluid is evident in both patient positions consistent with a higher volume state. Subjects with a grade 2 antrum have over 100 ml of gastric fluid in 75% of cases.

## Discussion

Until recently, there were no readily available tools to assess gastric content in the acute setting. Paracetamol absorption, electrical impedance tomography, radiolabelled diet, polyethylene glycol dilution, and gastric content aspiration are invasive methods to study GV or gastric emptying and are not applicable in the perioperative period.<sup>38–42</sup>

Gastric ultrasonography has been used by gastroenterologists for over two decades to assess gastric motility and emptying<sup>43–46</sup> or to diagnose gastric wall lesions such as cancer.<sup>47–49</sup> Sequential ultrasound measurements of antral CSA at fixed time intervals after a standardized solid–liquid meal have been reported.<sup>33</sup> This approach has been used by gastroenterologists to study gastric emptying time and motility<sup>37 50 51</sup> and has been shown to correlate closely to scintigraphy, a more invasive gold standard using radioactive material.<sup>52</sup>

However, it was only recently that bedside ultrasound has been used to evaluate gastric content and volume to assess perioperative aspiration risk and guide anaesthetic management.

As a new diagnostic tool, gastric sonography needs to be characterized in terms of its *validity* (does it assess what it intends to assess, and how accurately), *reliability* (how reproducible are the results), and *interpretability* (i.e. what are the clinical implications of specific findings). Most studies to date deal with validity considerations and suggest that bedside ultrasound accurately determines GV.<sup>30 31 34</sup> Even though several descriptions of the type of content (i.e. empty, clear fluid, solid) have been published,<sup>19 23 26 28</sup> the sensitivity and specificity of a qualitative exam (how well can we differentiate between different types of content) remain to be studied in a systematic manner.

One single study on 15 subjects scanned by two independent sonographers suggests that antral assessment is highly reproducible.<sup>37</sup> The range of differences between the two observers was 1–13 ml when empty and 2–85 ml after a standardized meal. More rigorous studies after current recommended guidelines for assessing reliability need to be done.<sup>53</sup>

As data on the validity (i.e. accuracy) and reliability (i.e. reproducibility) of gastric sonography become increasingly available, the next important question is how to best incorporate this new diagnostic tool into daily clinical practice to assess aspiration risk and tailor anaesthetic management in appropriate cases.<sup>54 55</sup> We envision this tool to be useful in many clinical situations in which aspiration risk is unclear or undetermined. Three common clinical scenarios are as follows: first, patients who have not followed fasting guidelines, either because of a communication gap or due to the urgent nature of the clinical situation. Secondly, patients with delayed gastric emptying due to significant comorbidities in whom recommended fasting intervals may not reliably ensure an empty stomach (e.g. diabetic gastroparesis, advanced liver or renal dysfunction, critically ill patients). Finally, patients with unreliable or unclear history (e.g. language barrier, cognitive dysfunction, altered sensorium). In the absence of data, it is safer to assume a 'full stomach', leading to either surgical cancellations or re-scheduling in elective cases or in interventions to prevent aspiration, such as a rapid sequence induction and tracheal intubation. However, gastric ultrasound can help clinicians individualize aspiration risk at the bedside and more appropriately guide anaesthetic management (Fig. 6).

An empty stomach implies a low aspiration risk and can be determined solely on qualitative assessment. Solid, particulate, or thick fluid content, carrying a high aspiration risk, can also be detected based on sonographic appearance as previously discussed.<sup>56–58</sup>

In the presence of clear fluid, a sonographic volume assessment can determine if the volume present is consistent with baseline gastric secretions and negligible risk (up to 1.5 ml kg<sup>-1</sup>) or if it is a higher volume posing a significant aspiration risk requiring intervention.<sup>9–13 59–61</sup>

Several areas require further investigation including defining the minimum training requirements to ensure accurate assessments. In addition, most of the current published data pertains to adult individuals. Volume assessment models in particular have only been validated for adult non-pregnant patients and further work is required in the paediatric and obstetric patient populations. In addition, 3D and 4D ultrasonography are newer imaging modalities that may have a future role in ultrasound gastric assessment.<sup>62</sup>

## Authors' contributions

P.V.P. performed literature searches, selected citations and articles for eligibility, performed data extraction, summarized the results on tables, prepared Figures 1, 5, and 6, prepared the first draft of the manuscript, and read and approved the final manuscript; A.P. conceived the study, performed literature searches, selected citations and articles for eligibility, performed



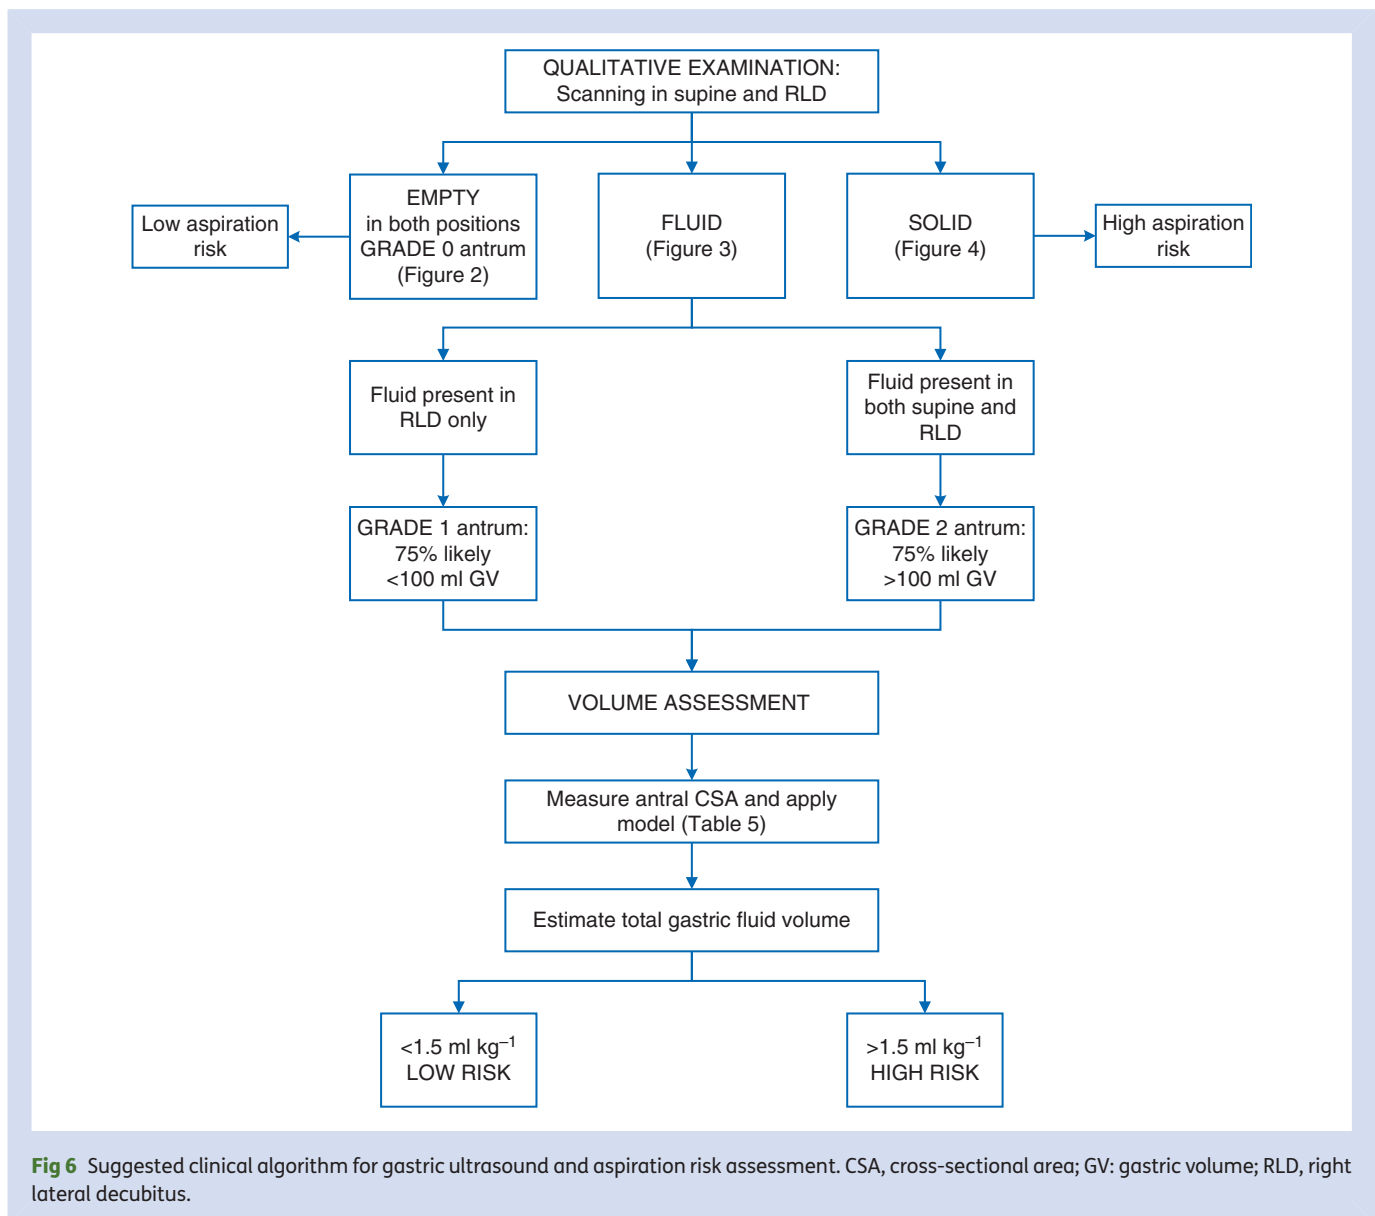

data extraction, edited the manuscript and tables, prepared Figures 2–4, and read and approved the final manuscript.

## Declaration of interest

None declared.

## Funding

No external funding has been received for this study. A.P. received support for academic time from the University of Toronto Department of Anesthesia through a 2011–3 Merit Award Competition.

## References

- Sakai T, Planinsic RM, Quinlan JJ, Handley LJ, Kim TY, Hilmi IA. The incidence and outcome of perioperative pulmonary aspiration in a university hospital: a 4-year retrospective analysis. *Anesth Analg* 2006; **103**: 941–7
- Neilipovitz DT, Crosby ET. No evidence for decreased incidence of aspiration after rapid sequence induction. *Can J Anaesth* 2007; **54**: 748–64
- Ng A, Smith G. Gastroesophageal reflux and aspiration of gastric contents in anesthetic practice. *Anesth Analg* 2001; **93**: 494–513
- Borland LM, Sereika SM, Woelfel SK, et al. Pulmonary aspiration in pediatric patients during general anesthesia: incidence and outcome. *J Clin Anesth* 1998; **10**: 95–102
- Kozlow J, Berenholtz S, Garrett E, Dorman T, Pronovost P. Epidemiology and impact of aspiration pneumonia in patients undergoing surgery in Maryland, 1999–2000. *Crit Care Med* 2003; **31**: 1930–7
- Warner MA, Warner ME, Weber JG. Clinical significance of pulmonary aspiration during the perioperative period. *Anesthesiology* 1993; **78**: 56–62
- Shime N, Ono A, Chihara E, Tanaka Y. Current status of pulmonary aspiration associated with general anesthesia: a nationwide survey in Japan. *Masui* 2005; **54**: 1177–85
- Lienhart A, Auroy Y, Pequignot F, et al. Survey of anesthesia related mortality in France. *Anesthesiology* 2006; **105**: 1087–97

- 9 Agarwal A, Chari P, Singh H. Fluid deprivation before operation: the effect of a small drink. *Anesthesia* 1989; **44**: 632–4
- 10 Read MS, Vaughan RS. Allowing pre-operative patients to drink: effects on patients' safety and comfort of unlimited oral water until 2 hours before anaesthesia. *Acta Anaesthesiol Scand* 1991; **35**: 591–5
- 11 Phillips S, Hutchinson S, Davidson T. Preoperative drinking does not affect gastric contents. *Br J Anaesth* 1993; **70**: 6–9
- 12 Harter R, Kelly W, Kramer M, Perz C, Dzwonczyk R. A comparison of the volume and pH of gastric contents of obese and lean surgical patients. *Anesth Analg* 1998; **86**: 147–52
- 13 Hausel J, Nygren J, Lagerkranser M, et al. A carbohydrate-rich drink reduces preoperative discomfort in elective surgery patients. *Anesth Analg* 2001; **93**: 1344–50
- 14 Cotton BR, Smith G. The lower oesophageal sphincter and anaesthesia. *Br J Anaesth* 1984; **56**: 37–46
- 15 Vanner RG, Pryle BJ, O'Dwyer JP, Reynolds F. Upper oesophageal sphincter pressure and the intravenous induction of anaesthesia. *Anaesthesia* 1992; **47**: 371–5
- 16 Smith I, Kranke P, Murat I, et al. European Society of Anaesthesiology. Perioperative fasting in adults and children: guidelines from the European Society of Anaesthesiology. *Eur J Anaesthesiol* 2011; **28**: 556–69
- 17 American Society of Anaesthesiologists. Practice guidelines for preoperative fasting and the use of pharmacologic agents to reduce the risk of pulmonary aspiration: application to healthy patients undergoing elective procedures. *Anesthesiology* 2011; **114**: 495–511
- 18 Moher D, Liberati A, Tetzlaff J, Altman DG; PRISMA Group. Preferred reporting items for systematic reviews and meta-analyses: the PRISMA statement. *Ann Intern Med* 2009; **151**: 264–9
- 19 Sijbrandij LS, Op den Orth JO. Transabdominal ultrasound of the stomach: a pictorial essay. *Eur J Radiol* 1991; **13**: 81–7
- 20 Carp H, Jayaram A, Stoll M. Ultrasound examination of the stomach contents of parturients. *Anesth Analg* 1992; **74**: 683–7
- 21 Jayaram A, Bowen MP, Deshpande S, Carp HM. Ultrasound examination of the stomach contents of women in the postpartum period. *Anesth Analg* 1997; **84**: 522–6
- 22 Jacoby J, Smith G, Eberhardt M, Heller M. Bedside ultrasound to determine prandial status. *Am J Emerg Med* 2003; **21**: 216–9
- 23 Perlas A, Chan VW, Lupu CM, Mitsakakis N, Hanbidge A. Ultrasound assessment of gastric content and volume. *Anesthesiology* 2009; **111**: 82–9
- 24 Bouvet L, Miquel A, Chassard D, Boselli E, Allaouchiche B, Benhamou D. Could a single standardized ultrasound measurement of antral area be of interest for assessing gastric contents? A preliminary report. *Eur J Anaesthesiol* 2009; **26**: 1015–9
- 25 Sporea I, Popescu A. Ultrasound examination of the normal gastrointestinal tract. *Med Ultrason* 2010; **12**: 349–52
- 26 Koenig SJ, Lakticova V, Mayo PH. Utility of ultrasonography for detection of gastric fluid during urgent endotracheal intubation. *Intensive Care Med* 2011; **37**: 627–31
- 27 Perlas A, Davis L, Khan M, Mitsakakis N, Chan VW. Gastric sonography in the fasted surgical patient: a prospective descriptive study. *Anesth Analg* 2011; **113**: 93–7
- 28 Cubillos J, Tse C, Chan VW, Perlas A. Bedside ultrasound assessment of gastric content: an observational study. *Can J Anaesth* 2012; **59**: 416–23
- 29 Fujigaki T, Fukusaki M, Nakamura H, Shibata O, Sumikawa K. Quantitative evaluation of gastric contents using ultrasound. *J Clin Anesth* 1993; **5**: 451–5
- 30 Bouvet L, Mazoit JX, Chassard D, Allaouchiche B, Boselli E, Benhamou D. Clinical assessment of the ultrasonographic measurement of antral area for estimating preoperative gastric content and volume. *Anesthesiology* 2011; **114**: 1086–92
- 31 Perlas A, Mitsakakis N, Liu L, et al. Validation of a mathematical model for ultrasound assessment of gastric volume by gastroscopic examination. *Anesth Analg* 2013; **116**: 357–63
- 32 Hausken T, Gilha OH. *Functional Ultrasound of the Gastrointestinal Tract*. Medical Radiology. London: Springer Verlag, 2007; 189–97
- 33 Bolondi L, Bortolotti M, Santi V, Calletti T, Gaiani S, Labò G. Measurement of gastric emptying time by real-time ultrasonography. *Gastroenterology* 1985; **89**: 752–9
- 34 Hveem K, Hausken T, Berstad A. Ultrasonographic assessment of fasting liquid content in the human stomach. *Scand J Gastroenterol* 1994; **29**: 786–9
- 35 Tomomasa T, Tabata M, Nako Y, Kaneko H, Morikawa A. Ultrasonographic assessment of intragastric volume in neonates: factors affecting the relationship between intragastric volume and antral cross-sectional area. *Pediatr Radiol* 1996; **26**: 815–20
- 36 Schmitz A, Thomas S, Melanie F, et al. Ultrasonographic gastric antral area and gastric contents volume in children. *Paediatr Anaesth* 2012; **22**: 144–9
- 37 Ricci R, Bontempo I, Corazziari E, La Bella A, Torsoli A. Real time ultrasonography of the gastric antrum. *Gut* 1993; **34**: 173–6
- 38 Nimmo WS, Wilson J, Prescott LF. Narcotic analgesics and delayed gastric emptying during labour. *Lancet* 1975; **1**: 890–3
- 39 Sandhar BK, Elliot RH, Windram I, Rowbotham DJ. Peripartum changes in gastric emptying. *Anesthesia* 1992; **47**: 196–8
- 40 Billeau C, Guillet J, Sandler B. Gastric emptying in infants with or without gastroesophageal reflux according to the type of milk. *Eur J Clin Nutr* 1990; **44**: 577–83
- 41 Naslund E, Bogefors J, Gryback H. Gastric emptying: comparison of scintigraphic, polyethylene glycol dilution and paracetamol tracer techniques. *Scand J Gastroenterol* 2000; **35**: 375–9
- 42 Splinter WM, Schafer JD. Ingestion of clear fluid safe for adolescents up to 3 hours before anaesthesia. *Br J Anaesth* 1991; **66**: 48–52
- 43 Holt S, McDicken WN, Anderson T, Stewart IC, Heading RC. Dynamic imaging of the stomach by real-time ultrasound—a method for the study of gastric motility. *Gut* 1980; **21**: 597–601
- 44 Bateman DN, Whittingham TA. Measurement of gastric emptying by real-time ultrasound. *Gut* 1982; **23**: 524–7
- 45 Soreide E, Hausken T, Soreide J, Steen P. Gastric emptying of a light hospital breakfast. A study using real time ultrasonography. *Acta Anaesthesiol Scand* 1996; **40**: 549–53
- 46 Darwiche G, Almér LO, Björgell O, Cederholm C, Nilsson P. Measurement of gastric emptying by standardized real-time ultrasonography in healthy subjects and diabetic patients. *J Ultrasound Med* 1999; **18**: 673–82
- 47 Hata J, Haruma K, Manabe N, et al. Chapter 16: Gastric cancer. In: Maconi G, Bianchi Porro G, eds. *Ultrasound of the Gastrointestinal Tract*. Medical Radiology Diagnostic Imaging Series. Berlin: Springer-Verlag, 2007
- 48 Ishigami S, Yoshinaka H, Sakamoto F, et al. Preoperative assessment of the depth of early gastric cancer invasion by transabdominal ultrasound sonography (TUS): a comparison with endoscopic ultrasound sonography (EUS). *Hepatogastroenterology* 2004; **51**: 1202–5
- 49 Wong M, Shum S, Chau W, Cheng C. Carcinoma of stomach detected by routine transabdominal ultrasound. *Biomed Imaging Interv J* 2010; **6**: e39–41

- 50 Wong CA, Loffredi M, Ganchiff JN, Zhao J, Wang Z, Avram MJ. Gastric emptying of water in term pregnancy. *Anesthesiology* 2002; **96**: 1395–400
- 51 Wong CA, McCarthy RJ, Fitzgerald PC, Raikoff K, Avram MJ. Gastric emptying of water in obese pregnant women at term. *Anesth Analg* 2007; **105**: 751–5
- 52 Darwiche G, Björgell O, Thorsson O, Almér LO. Correlation between simultaneous scintigraphic and ultrasonographic measurement of gastric emptying in patients with type 1 diabetes mellitus. *J Ultrasound Med* 2003; **22**: 459–66. Erratum in: *J Ultrasound Med* 2003; **22**: 690
- 53 Kottner J, Audigé L, Brorson S, et al. Guidelines for Reporting Reliability and Agreement Studies (GRRAS) were proposed. *J Clin Epidemiol* 2011; **64**: 96–106
- 54 Van de Putte P. Bedside gastric ultrasonography to guide anesthetic management in a nonfasted emergency patient. *J Clin Anesth* 2013; **25**: 165–6
- 55 Tampo A, Suzuki A, Ijiri E, Kunisawa T, Iwasaki H. Preanesthetic gastric assessment with sonography for a patient with a full stomach. *J Clin Anesth* 2013; **25**: 164–5
- 56 Mendelson CL. The aspiration of stomach contents into the lungs during obstetric anesthesia. *Am J Obstet Gynecol* 1946; **52**: 191–205
- 57 Marik PE. Pulmonary aspiration syndromes. *Curr Opin Pulm Med* 2011; **17**: 148–54
- 58 Downing TE, Sporn TA, Bollinger RR, Davis RD, Parker W, Lin SS. Pulmonary histopathology in an experimental model of chronic aspiration is independent of acidity. *Exp Biol Med* 2008; **233**: 1202–12
- 59 Hutchinson A, Maltby JR, Reid CR. Gastric fluid volume and PH in elective inpatients. Part I: coffee or orange juice versus overnight fast. *Can J Anaesth* 1988; **35**: 12–5
- 60 Maltby JR, Lewis P, Martin A, Sutherland LR. Gastric fluid volume and pH in elective patients following unrestricted oral fluid until three hours before surgery. *Can J Anaesth* 1991; **38**: 425–9
- 61 Lobo D, Hendry PO, Rodrigues G, et al. Gastric emptying of 3 liquid oral preoperative metabolic preconditioning regimens measured by magnetic resonance imaging in healthy adult volunteers: a randomized double-blind, cross-over study. *Clin Nutr* 2009; **28**: 636–41
- 62 Manini ML, Burton DD, Meixner DD, et al. Feasibility and application of 3-dimensional ultrasound for measurement of gastric volumes in healthy adults and adolescents. *J Pediatr Gastroenterol Nutr* 2009; **48**: 287–93

Handling editor: J. G. Hardman
